# Supplementary material
Source: publisher site journal article supplement (https://www.dovepress.com/article/337822)
Supplement: Supplementary file 1 [file get_supplementary_file.php]

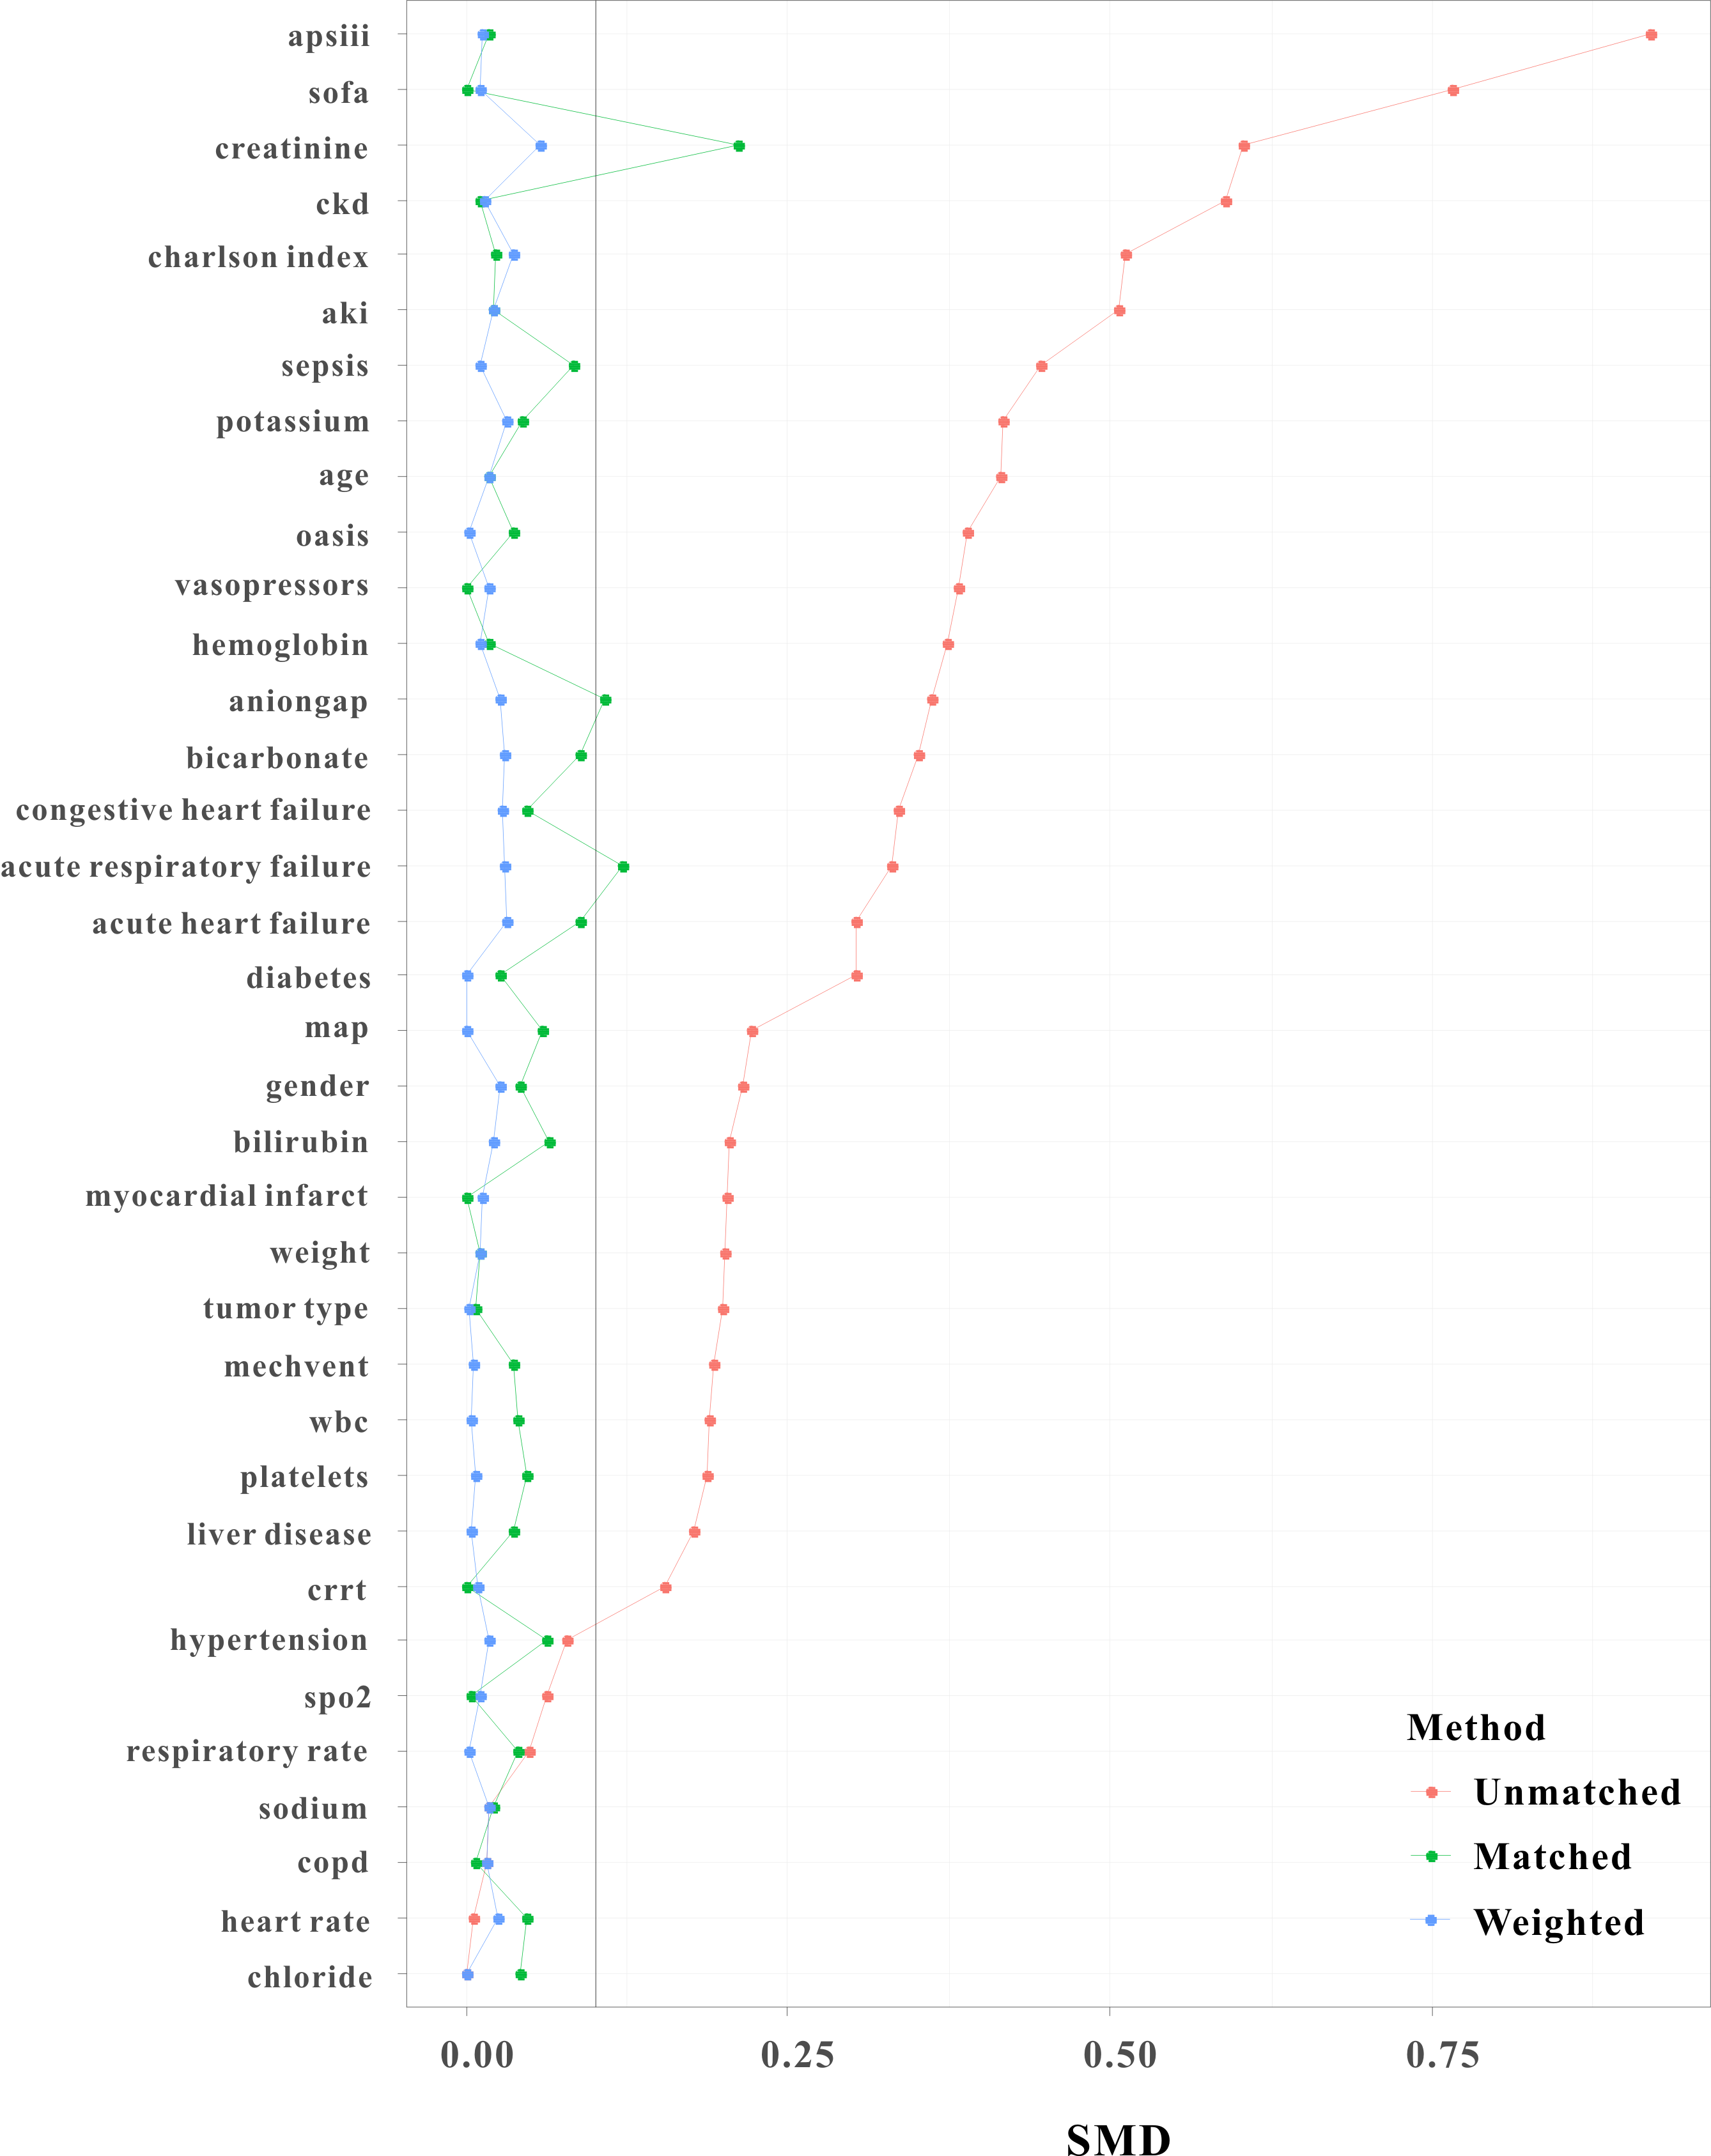


**Supplemental Figure 1:** Standardized mean difference (SMD) of variables before and after propensity score matching and weighting.
